# Supplementary material
Source: ML conference proceedings conference paper supplement (https://openreview.net/forum?id=wyIlqIMMnZ)

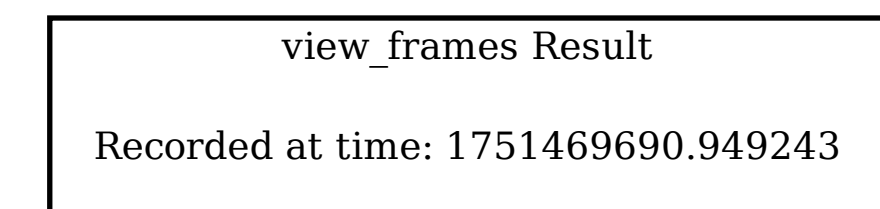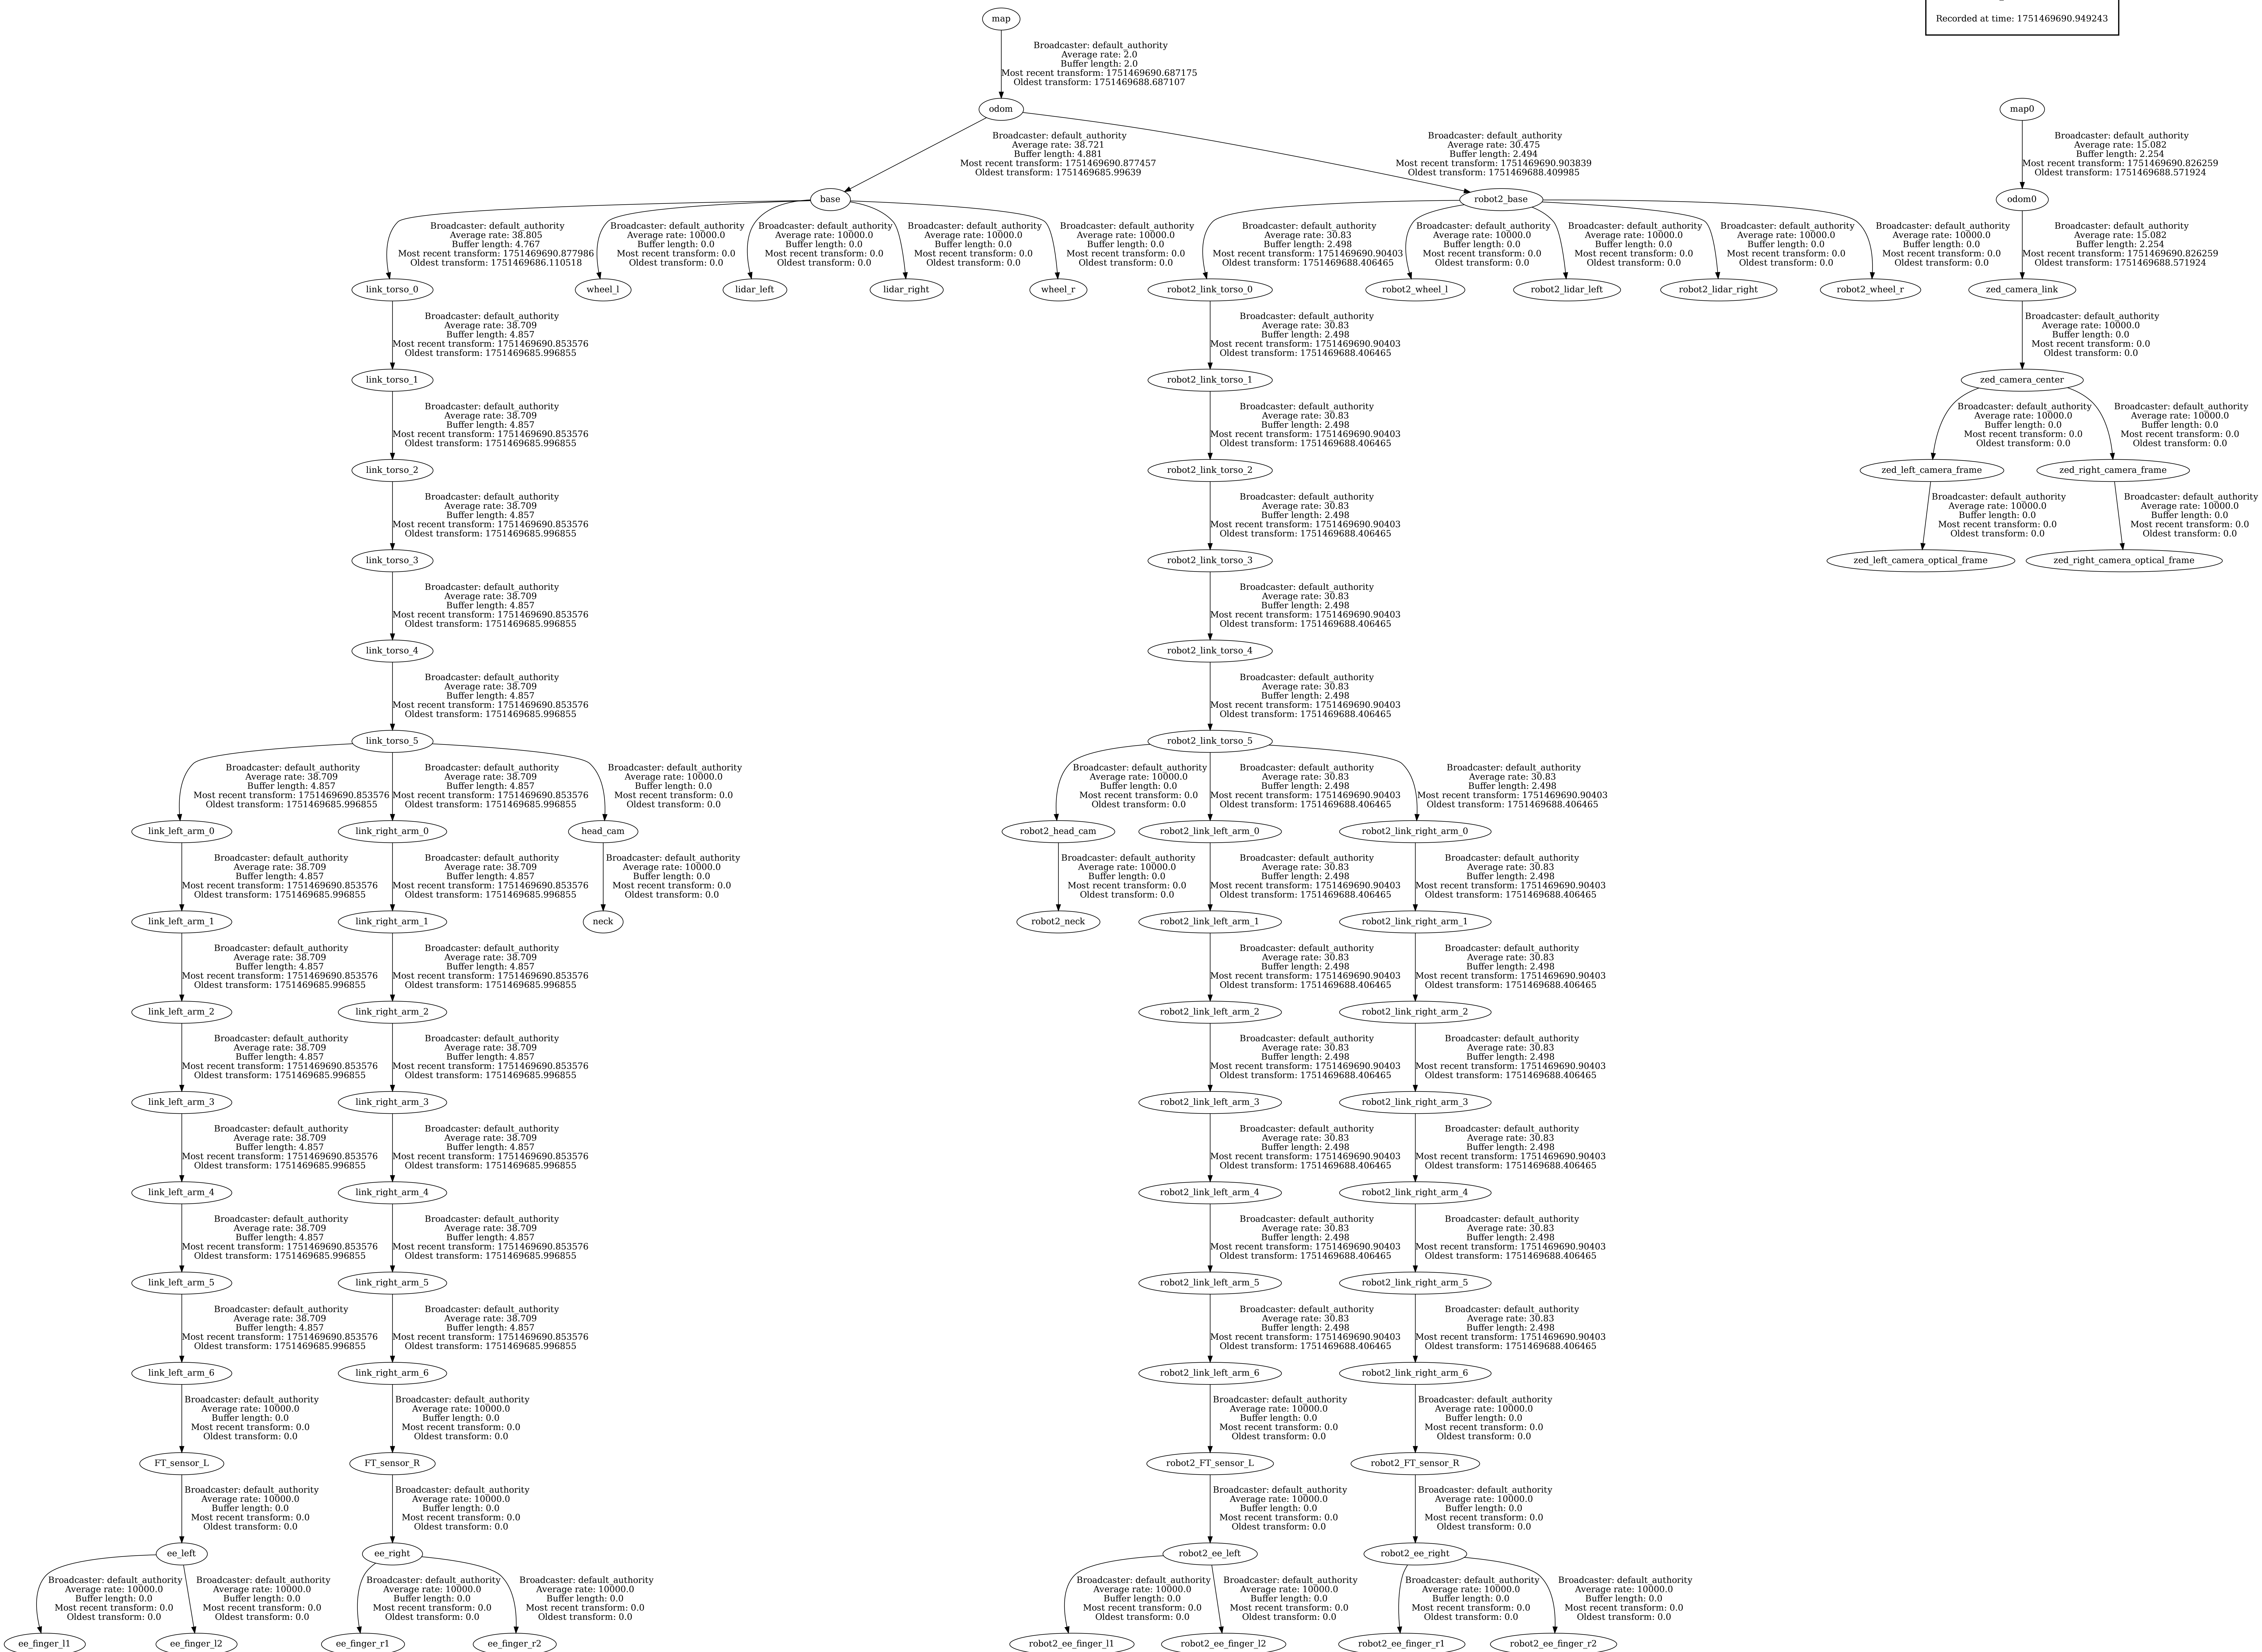

Supplement: supplementary_material [file tf_tree_inference.pdf › supplementary/code/real/doc/tf_tree_inference.pdf]

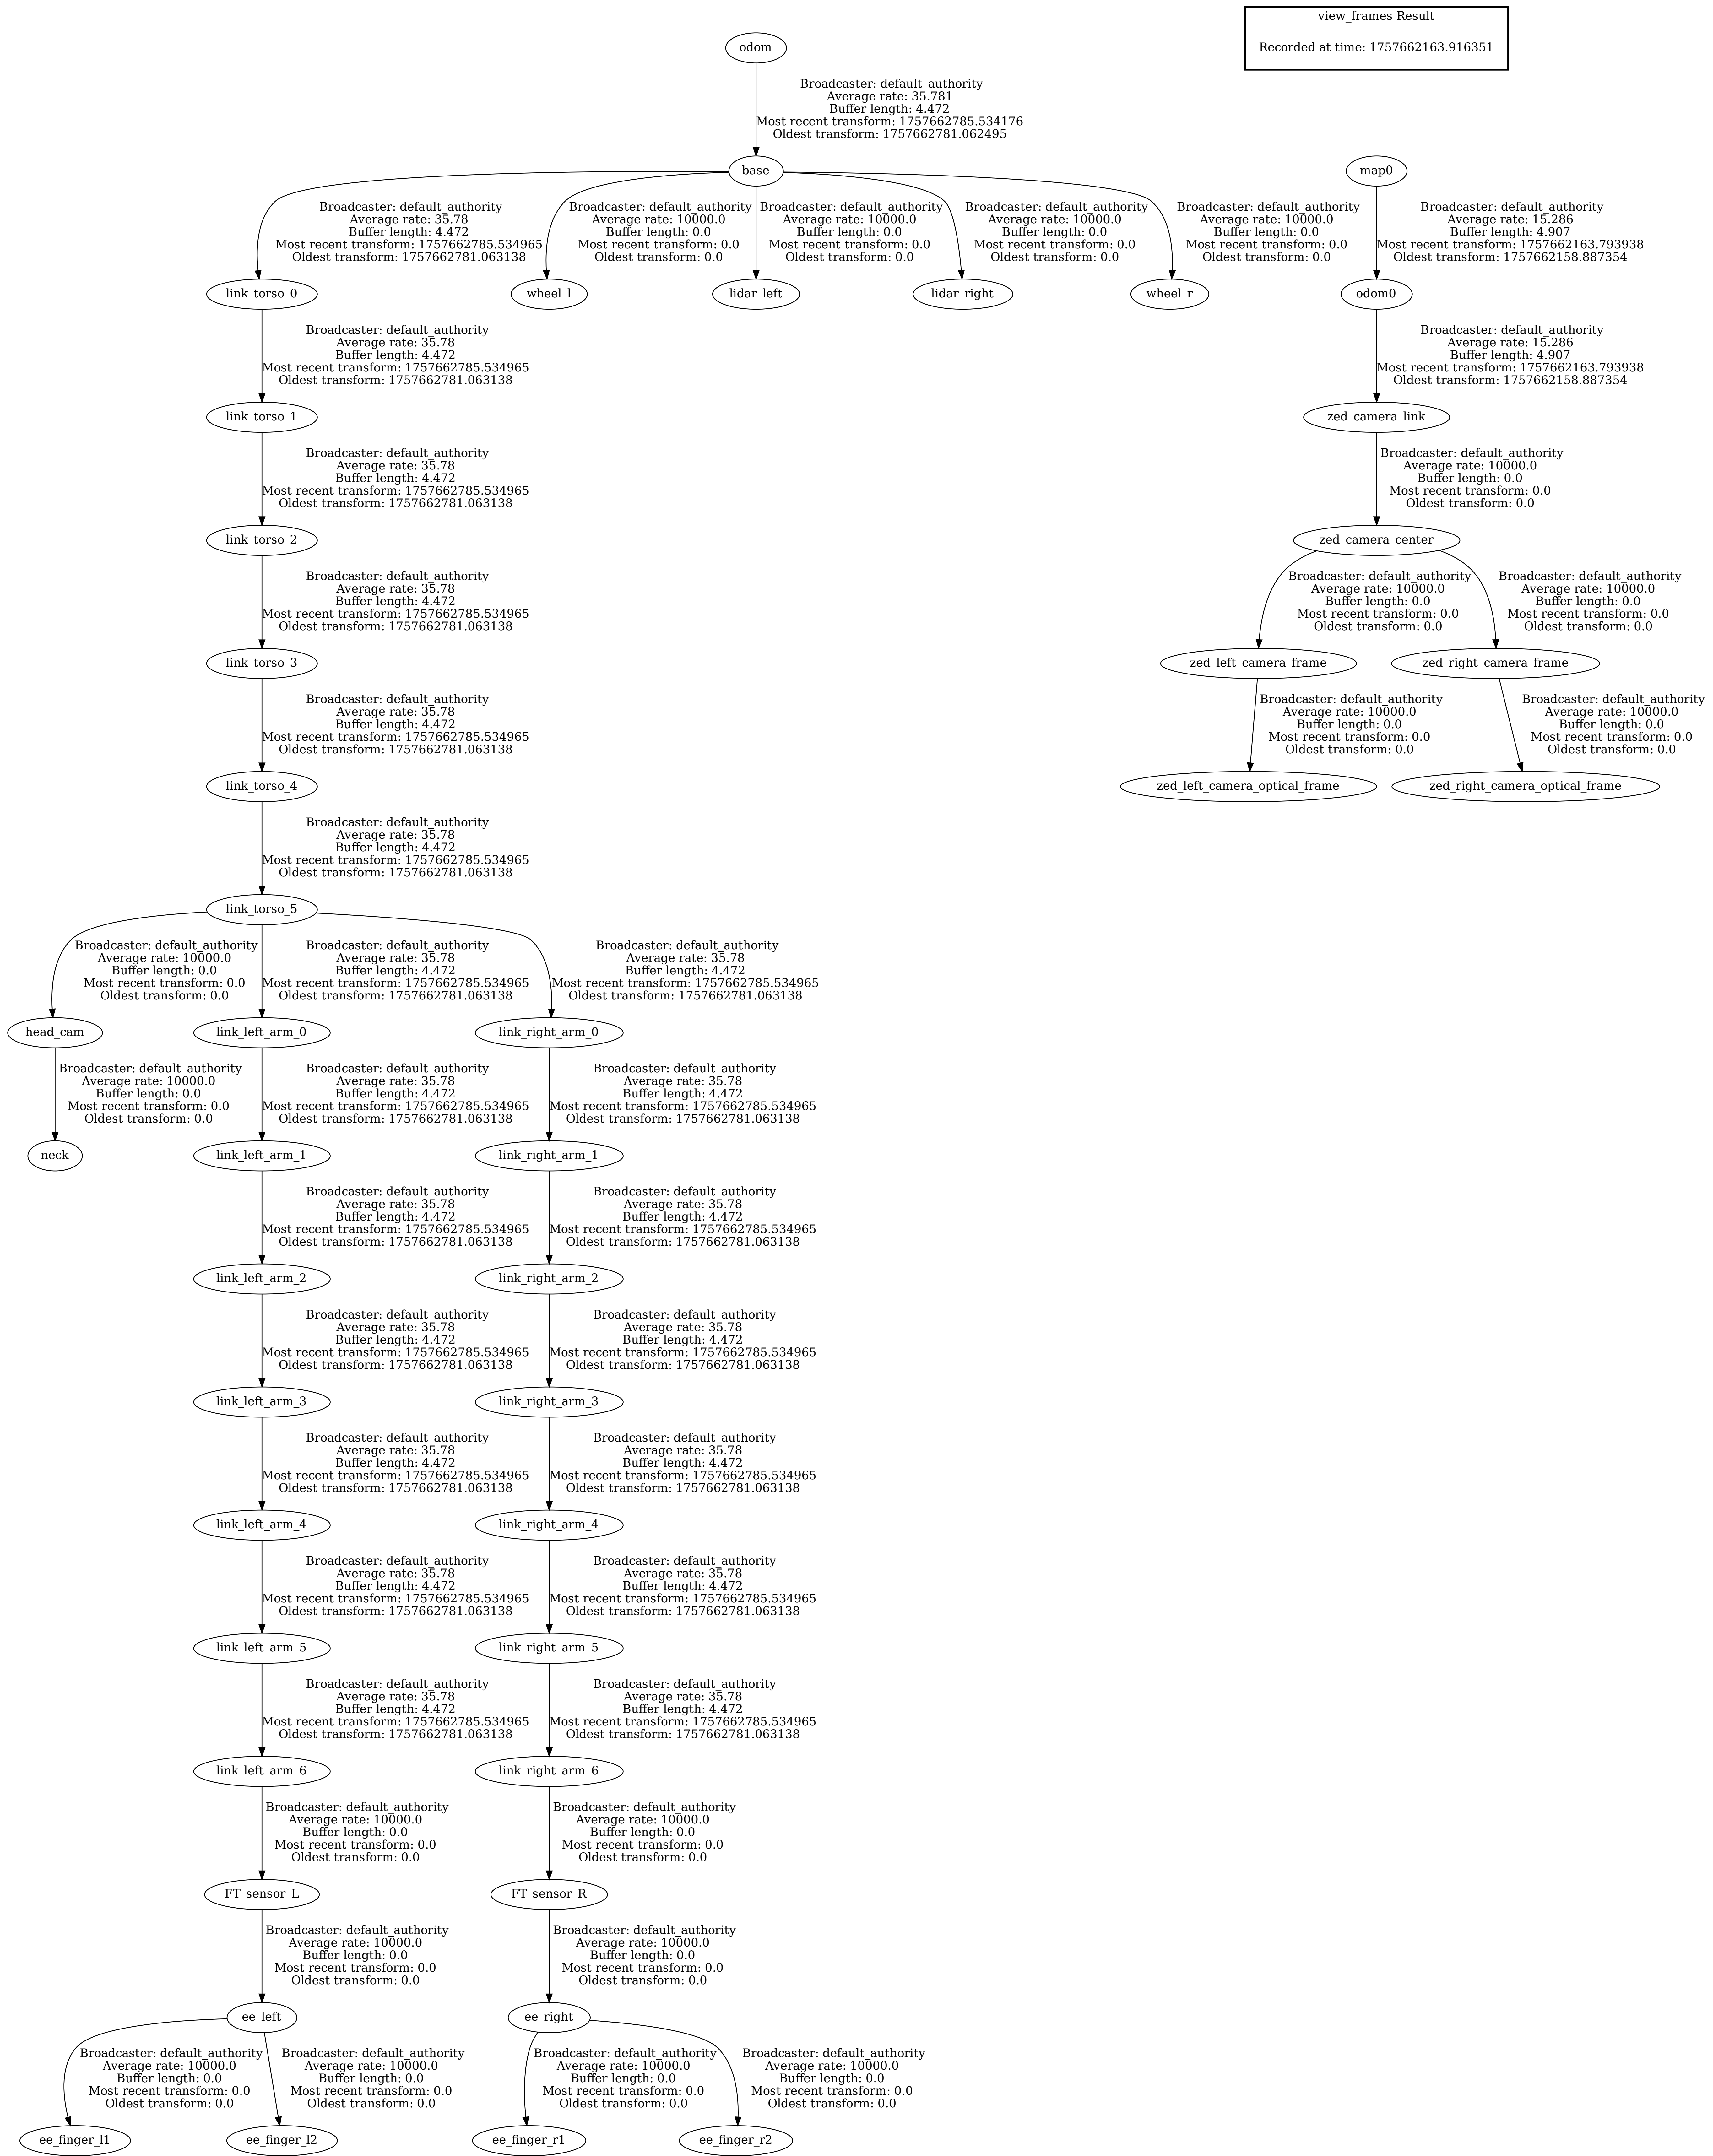

Supplement: supplementary_material [file tf_tree_rollout.pdf › supplementary/code/real/doc/tf_tree_rollout.pdf]
